# Supplementary material for: Healthy Food Environments in Food Pantries: Lessons Learned from a Sodium Reduction Intervention
Source: MDPI journal article supplement (doi:10.3390/ijerph182413206), 2021-12-15
Supplement: s1 [file s1]

- 1) We will serve our clients with **dignity**.
  - We will create environments that allow clients to have more freedom to choose which foods fit their dietary needs.
  - We will provide healthy choices.
  - We will serve with abundance.
- 2) We will put our clients' health first by prioritizing the distribution of recommended **USDA's MyPlate** foods such as:
  - Fruits and vegetables, especially fresh
  - Whole grains
  - Low-fat or non-fat dairy and milk products
  - A variety of protein foods
  - Foods lower in sodium and with less added sugar
- 3) We will provide **more fresh foods**.
  - We will seek to supplement donated foods with the purchase of fresh foods as well as distribution of Elk Run Farm produce.
  - When purchasing food, we will seek to limit processed foods to those that are low in sodium and added sugars.
- 4) We will use **behavioral economics** strategies to highlight healthy food options so the healthy choice is the easy choice.
- 5) We will provide **nutrition education** about the foods that we distribute and information on how to prepare them.
  - We will focus education on key health concerns for our region, especially high blood pressure and diabetes.
  - We will provide information like recipes and pamphlets
  - When possible, we will translate materials into languages other than English.
  - We will provide food samples and cooking demonstrations when possible.
- 6) We will **educate our community** about the disparities that exist in South King County.
  - We will inform our donors about the importance of donating foods that help to improve our clients' health.
  - We will highlight to our community members the importance of their neighbors' health and provide them with a forum to enact change.

**Figure S1.** Policy commitments from the *South King County Food Coalition Nutrition Standards*, 2018.
